# Supplementary material for: Interventions to improve gross motor performance in children with neurodevelopmental disorders: a meta-analysis
Source: PubMed Central journal article supplement (PMC5129231; doi:10.1186/s12887-016-0731-6), 2016-11-29

Least Conservative estimates

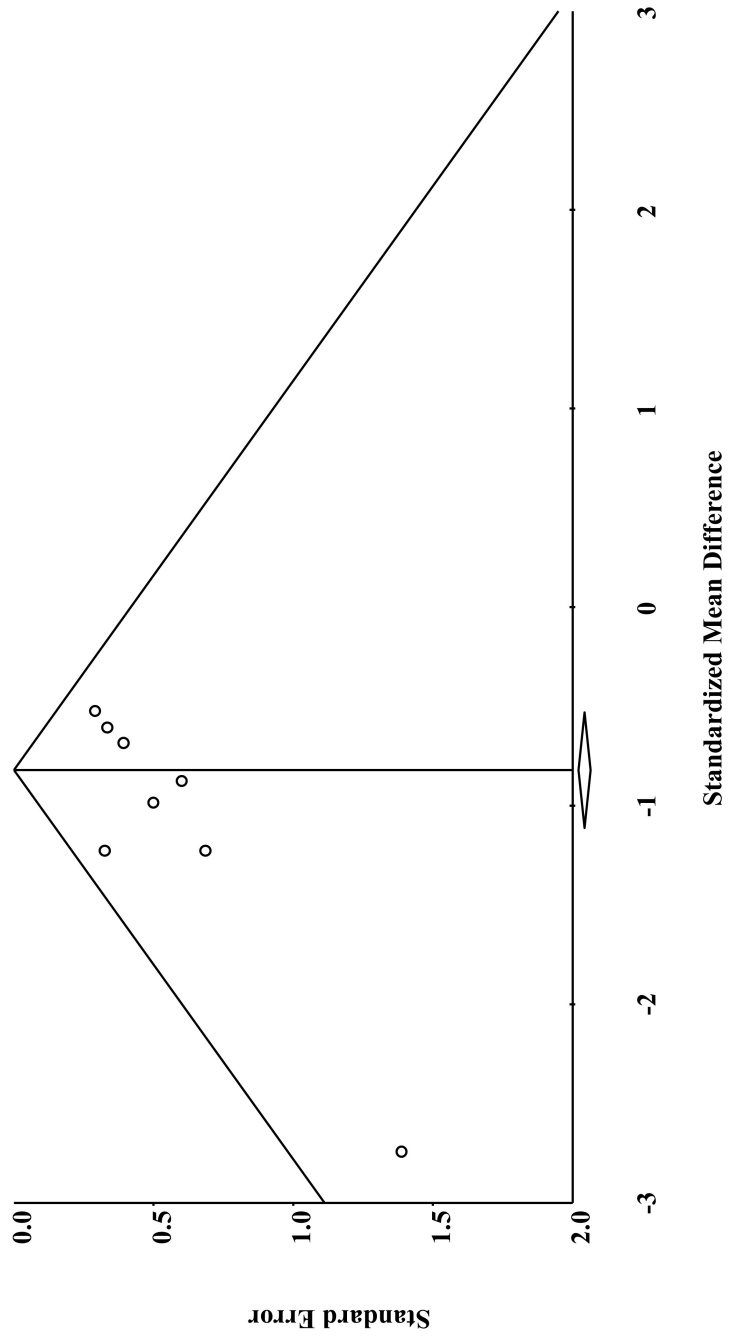

Supplement: 12887_2016_731_MOESM5_ESM.pdf [file 12887_2016_731_MOESM5_ESM.pdf]
